# Supplementary material for: DFT analysis into the intermediates of nickel pyridinethiolate catalysed proton reduction
Source: Royal Society of Chemistry journal article supplement (doi:10.1039/c5dt02044a), 2015-01-01
Supplement: c5dt02044a1.pdf [file c5dt02044a1.pdf]

SUPPORTING INFORMATION  
For Dalton Transactions

DFT analysis into the intermediates of nickel pyridine thiolate catalyzed proton reduction  
Carolyn N. Virca and Theresa M. McCormick

**Table S1: Error in bond lengths of calculated vs experimental structures**

|                            | <b>B3LYP<br/>Ethanol<br/>CPCM</b> | <b>B3LYP<br/>gas</b> | <b>B3LYP<br/>Water CPCM</b> | <b>B3P86<br/>Ethanol<br/>CPCM</b> | <b>B3P86<br/>gas</b> | <b>B3P86<br/>Water CPCM</b> |
|----------------------------|-----------------------------------|----------------------|-----------------------------|-----------------------------------|----------------------|-----------------------------|
| <b>Bond</b>                | <b>%Error</b>                     | <b>%Error</b>        | <b>%Error</b>               | <b>%Error</b>                     | <b>%Error</b>        | <b>%Error</b>               |
| Ni-N1                      | 1.73                              | 1.46                 | 2.76                        | 1.43                              | 1.80                 | 1.40                        |
| Ni-N2                      | 2.98                              | 2.95                 | 1.18                        | 0.01                              | 0.15                 | 0.16                        |
| Ni-N3                      | -0.86                             | -0.50                | -0.53                       | -1.78                             | -2.07                | -1.93                       |
| Ni-S1                      | 0.95                              | 2.69                 | 2.45                        | 0.33                              | 0.50                 | 0.32                        |
| Ni-S2                      | 3.25                              | 3.07                 | 2.76                        | 1.34                              | 0.88                 | 1.48                        |
| Ni-S3                      | 3.52                              | 1.81                 | 3.79                        | 1.07                              | -0.15                | 1.08                        |
| <b>Energy<br/>Hartrees</b> | 3445.962706                       | -3445.882271         | -3445.965484                | -3449.714625                      | -3449.632615         | -3449.717432                |

**Table S2: Structure, energy, charge and spin state. B3P86 basis set unless indicated**

| <b>Compound Name</b> | <b>Solvent</b>   | <b>Structure</b>                                                                    | <b>G in Hartrees</b> | <b>Charge</b> | <b>Spin State</b> |
|----------------------|------------------|-------------------------------------------------------------------------------------|----------------------|---------------|-------------------|
| <b>1<sup>-</sup></b> | Gas<br>B3LYP     | 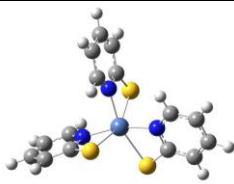 | -3445.882271         | -1            | 3                 |
| <b>1<sup>-</sup></b> | Water<br>B3LYP   |  | -3445.965484         | -1            | 3                 |
| <b>1<sup>-</sup></b> | Ethanol<br>B3LYP |  | -3445.962706         | -1            | 3                 |

|                 |         |                                                                                     |              |    |   |
|-----------------|---------|-------------------------------------------------------------------------------------|--------------|----|---|
| 1 <sup>-</sup>  | gas     | 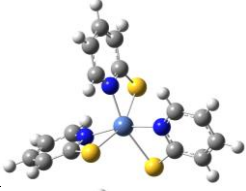   | -3449.632615 | -1 | 3 |
| 1 <sup>-</sup>  | water   |    | -3449.717432 | -1 | 3 |
| 1 <sup>-</sup>  | ethanol |    | -3449.714625 | -1 | 3 |
| 1 <sup>2-</sup> | water   |    | -3449.831984 | -2 | 2 |
| 2 <sub>N</sub>  | gas     |   | -3450.134284 | 0  | 3 |
| 2 <sub>N</sub>  | water   |  | -3450.157986 | 0  | 3 |
| 2 <sub>N</sub>  | water   |  | -3450.146910 | 0  | 1 |
| 2 <sub>s</sub>  | water   |  | -3450.143324 | 0  | 3 |

|                 |       |                                                                                     |              |    |   |
|-----------------|-------|-------------------------------------------------------------------------------------|--------------|----|---|
| 2s-             | water | 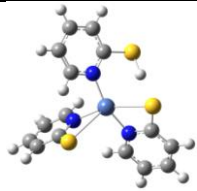   | -3450.286344 | -1 | 2 |
| 4               | water |    | -3526.752702 | 0  | 3 |
| 4               | gas   |    | -3526.727817 | 0  | 3 |
| 2N <sup>-</sup> | water |    | -3450.300346 | -1 | 2 |
| 4 <sup>-</sup>  | water |  | -3526.849769 | -1 | 2 |
| 2N <sup>-</sup> | water |  | -3450.274555 | -1 | 4 |
| 3               | gas   |  | -3450.789136 | -1 | 1 |
| 3               | water |  | -3450.789136 | -1 | 1 |

|                      |       |                                                                                     |              |    |   |
|----------------------|-------|-------------------------------------------------------------------------------------|--------------|----|---|
| <b>3</b>             | water | 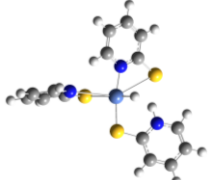   | -3450.887105 | -1 | 3 |
| <b>TS</b>            | water |    | -3450.886085 | -1 | 3 |
| <b>6</b>             | water |    | -3450.351589 | -2 | 1 |
| <b>6</b>             | water |    | -3450.408214 | -2 | 3 |
| <b>7</b>             | water |   | -3450.738376 | 0  | 2 |
| Water                | water |                                                                                     | -76.604920   | 0  | 1 |
| Hydrogen             | water |                                                                                     | -1.176915    | 0  | 1 |
| <b>8</b>             | water |  | -3450.418485 | -2 | 3 |
| <b>5</b>             | water |  | -3526.285591 | -1 | 3 |
| <b>5<sup>-</sup></b> | water |  | -3526.409986 | -2 | 2 |



## Optimized Structure Coordinates

### 1- B3LYP gas:

|    |             |             |             |
|----|-------------|-------------|-------------|
| Ni | 0.08937700  | -0.30871400 | -0.13236700 |
| C  | 2.98138100  | 0.55450800  | 0.86186000  |
| C  | 3.93661500  | -1.76154800 | -0.25875500 |
| C  | 4.34469300  | 0.29280800  | 0.95135500  |
| H  | 2.54531000  | 1.45839300  | 1.28235100  |
| C  | 4.81862200  | -0.89888000 | 0.37170800  |
| H  | 4.27601200  | -2.68640800 | -0.71497800 |
| H  | 5.01014600  | 0.99100600  | 1.45049500  |
| H  | 5.87889200  | -1.14389500 | 0.41676700  |
| C  | -0.68502800 | 2.35289800  | 1.46742200  |
| C  | -0.48278600 | 3.72977900  | -0.90073000 |
| C  | -0.92555700 | 3.72417100  | 1.47742700  |
| H  | -0.76222600 | 1.74234800  | 2.36469700  |
| C  | -0.81713700 | 4.41525700  | 0.25696700  |
| H  | -0.39634900 | 4.23817900  | -1.85626300 |
| H  | -1.19226500 | 4.23105600  | 2.40023900  |
| H  | -0.99821200 | 5.48864700  | 0.21886400  |
| C  | -2.77947300 | -0.88894200 | -1.31271200 |
| C  | -4.07137600 | -1.38128900 | -1.15240300 |
| H  | -2.42919500 | -0.46836300 | -2.25260100 |
| C  | -3.49638500 | -1.89985600 | 1.13948600  |
| C  | -4.42358700 | -1.89539700 | 0.10827000  |
| H  | -4.77484200 | -1.36397200 | -1.97965700 |
| H  | -3.74151100 | -2.29202700 | 2.12181900  |
| H  | -5.42426900 | -2.29103300 | 0.27687700  |
| N  | 2.12286500  | -0.27406700 | 0.25672200  |
| N  | -0.35355200 | 1.68692200  | 0.35396200  |
| N  | -1.88093200 | -0.89281400 | -0.32077100 |
| C  | -2.19533500 | -1.38450000 | 0.91124100  |
| C  | -0.24913200 | 2.33094500  | -0.84402000 |
| C  | 2.55651700  | -1.43534100 | -0.31517300 |
| S  | 1.30495600  | -2.36939100 | -1.05299000 |
| S  | -0.90157700 | -1.31214100 | 2.06297300  |
| S  | 0.17256500  | 1.30478800  | -2.17394500 |

### 1- B3LYP water

|    |         |          |          |
|----|---------|----------|----------|
| Ni | 0.06598 | -0.30522 | -0.13197 |
| C  | 2.9456  | 0.4957   | 0.88962  |
| C  | 3.91666 | -1.80139 | -0.26253 |
| C  | 4.30627 | 0.23021  | 0.98881  |
| H  | 2.50595 | 1.39016  | 1.32331  |
| C  | 4.79231 | -0.9465  | 0.39563  |
| H  | 4.26905 | -2.71611 | -0.72852 |

|   |          |          |          |
|---|----------|----------|----------|
| H | 4.96356  | 0.91825  | 1.51015  |
| H | 5.85056  | -1.18984 | 0.44968  |
| C | -0.60164 | 2.37623  | 1.47025  |
| C | -0.37498 | 3.73717  | -0.90608 |
| C | -0.79348 | 3.75354  | 1.47493  |
| H | -0.68371 | 1.78058  | 2.37567  |
| C | -0.67586 | 4.43901  | 0.25516  |
| H | -0.27998 | 4.24501  | -1.86071 |
| H | -1.02743 | 4.27222  | 2.39886  |
| H | -0.81956 | 5.51602  | 0.2164   |
| C | -2.83925 | -0.81095 | -1.29443 |
| C | -4.14022 | -1.26832 | -1.11735 |
| H | -2.50027 | -0.38608 | -2.23557 |
| C | -3.54191 | -1.84447 | 1.15336  |
| C | -4.48908 | -1.79331 | 0.13747  |
| H | -4.85662 | -1.21492 | -1.93054 |
| H | -3.78839 | -2.24515 | 2.13155  |
| H | -5.49708 | -2.15925 | 0.31666  |
| N | 2.09459  | -0.3271  | 0.25396  |
| N | -0.30857 | 1.69362  | 0.35104  |
| N | -1.91992 | -0.85948 | -0.3162  |
| C | -2.23748 | -1.36612 | 0.90447  |
| C | -0.19058 | 2.33911  | -0.83864 |
| C | 2.54517  | -1.47153 | -0.32521 |
| S | 1.29194  | -2.41091 | -1.10384 |
| S | -0.90884 | -1.34822 | 2.04492  |
| S | 0.19344  | 1.2826   | -2.18146 |

### 1<sup>-</sup> B3LYP ethanol

|    |          |          |          |
|----|----------|----------|----------|
| Ni | 0.06679  | -0.30496 | -0.13193 |
| C  | 2.94851  | 0.49634  | 0.88763  |
| C  | 3.91516  | -1.80343 | -0.26274 |
| C  | 4.30895  | 0.22913  | 0.98587  |
| H  | 2.51046  | 1.39196  | 1.32064  |
| C  | 4.79257  | -0.94915 | 0.3935   |
| H  | 4.26551  | -2.71926 | -0.72812 |
| H  | 4.96779  | 0.91687  | 1.50572  |
| H  | 5.85057  | -1.194   | 0.44677  |
| C  | -0.6034  | 2.37632  | 1.47007  |
| C  | -0.37733 | 3.73788  | -0.90589 |
| C  | -0.79653 | 3.75351  | 1.47506  |
| H  | -0.68546 | 1.78005  | 2.37513  |
| C  | -0.6791  | 4.4392   | 0.25526  |
| H  | -0.28253 | 4.24573  | -1.86054 |
| H  | -1.03141 | 4.2718   | 2.39901  |
| H  | -0.82379 | 5.51614  | 0.21657  |

|   |          |          |          |
|---|----------|----------|----------|
| C | -2.83641 | -0.81446 | -1.29547 |
| C | -4.1368  | -1.27404 | -1.11949 |
| H | -2.49668 | -0.39036 | -2.23672 |
| C | -3.54025 | -1.84597 | 1.15281  |
| C | -4.48612 | -1.79803 | 0.13571  |
| H | -4.85223 | -1.22325 | -1.93373 |
| H | -3.78689 | -2.24602 | 2.13124  |
| H | -5.49364 | -2.16585 | 0.31413  |
| N | 2.09577  | -0.32582 | 0.25394  |
| N | -0.30929 | 1.69424  | 0.35101  |
| N | -1.91847 | -0.85983 | -0.31606 |
| C | -2.23615 | -1.36537 | 0.90517  |
| C | -0.19161 | 2.33963  | -0.83898 |
| C | 2.54377  | -1.47181 | -0.32464 |
| S | 1.28865  | -2.40927 | -1.10044 |
| S | -0.90938 | -1.34396 | 2.04671  |
| S | 0.19327  | 1.28425  | -2.18137 |

#### 1<sup>-</sup> B3P86 gas

|    |          |          |          |
|----|----------|----------|----------|
| Ni | 0.09121  | -0.31139 | -0.12901 |
| C  | 2.95371  | 0.58215  | 0.8469   |
| C  | 3.90535  | -1.7357  | -0.25735 |
| C  | 4.31517  | 0.32541  | 0.92954  |
| H  | 2.51575  | 1.48778  | 1.26171  |
| C  | 4.78648  | -0.86694 | 0.35887  |
| H  | 4.24297  | -2.66369 | -0.70808 |
| H  | 4.98215  | 1.02913  | 1.41786  |
| H  | 5.84726  | -1.10899 | 0.39923  |
| C  | -0.69621 | 2.32111  | 1.45827  |
| C  | -0.48947 | 3.67496  | -0.91567 |
| C  | -0.9418  | 3.68833  | 1.45526  |
| H  | -0.77393 | 1.71479  | 2.35886  |
| C  | -0.83089 | 4.36664  | 0.23247  |
| H  | -0.40055 | 4.17431  | -1.87554 |
| H  | -1.21459 | 4.20244  | 2.37178  |
| H  | -1.01608 | 5.43856  | 0.18418  |
| C  | -2.75838 | -0.8734  | -1.30667 |
| C  | -4.04854 | -1.3574  | -1.13413 |
| H  | -2.41092 | -0.45602 | -2.24938 |
| C  | -3.45709 | -1.87251 | 1.14871  |
| C  | -4.39058 | -1.86529 | 0.1274   |
| H  | -4.75943 | -1.33838 | -1.95443 |
| H  | -3.69441 | -2.26081 | 2.1343   |
| H  | -5.3914  | -2.25525 | 0.30578  |
| N  | 2.0977   | -0.25172 | 0.25671  |
| N  | -0.35852 | 1.65093  | 0.35539  |



|   |          |          |          |
|---|----------|----------|----------|
| N | -1.85576 | -0.88057 | -0.32554 |
| C | -2.16031 | -1.36517 | 0.9064   |
| C | -0.25163 | 2.28209  | -0.84383 |
| C | 2.52882  | -1.41247 | -0.30696 |
| S | 1.2748   | -2.34119 | -1.02354 |
| S | -0.85624 | -1.29009 | 2.03096  |
| S | 0.17816  | 1.24212  | -2.14712 |

**1<sup>-</sup> B3P86 water**

|    |          |          |          |
|----|----------|----------|----------|
| Ni | 0.07036  | -0.30713 | -0.12697 |
| C  | 2.93039  | 0.52492  | 0.86661  |
| C  | 3.8824   | -1.78499 | -0.2617  |
| C  | 4.28899  | 0.25999  | 0.95205  |
| H  | 2.49538  | 1.42577  | 1.2922   |
| C  | 4.76434  | -0.92289 | 0.37152  |
| H  | 4.22735  | -2.70665 | -0.71931 |
| H  | 4.9539   | 0.95435  | 1.45438  |
| H  | 5.82278  | -1.16638 | 0.41543  |
| C  | -0.61535 | 2.34939  | 1.45932  |
| C  | -0.38971 | 3.68584  | -0.92402 |
| C  | -0.81731 | 3.72209  | 1.44984  |
| H  | -0.69637 | 1.75945  | 2.36896  |
| C  | -0.70035 | 4.39406  | 0.22687  |
| H  | -0.29471 | 4.18433  | -1.88346 |
| H  | -1.05911 | 4.24821  | 2.36715  |
| H  | -0.85262 | 5.4692   | 0.17701  |
| C  | -2.80897 | -0.81149 | -1.29459 |
| C  | -4.10556 | -1.26882 | -1.10958 |
| H  | -2.47097 | -0.3951  | -2.24031 |
| C  | -3.50046 | -1.82006 | 1.16004  |
| C  | -4.44781 | -1.78105 | 0.14816  |
| H  | -4.82468 | -1.2254  | -1.92054 |
| H  | -3.74219 | -2.21187 | 2.14291  |
| H  | -5.45403 | -2.148   | 0.33371  |
| N  | 2.07496  | -0.30395 | 0.25623  |
| N  | -0.31384 | 1.66191  | 0.3515   |
| N  | -1.89114 | -0.84891 | -0.32165 |
| C  | -2.20233 | -1.34158 | 0.90136  |
| C  | -0.19566 | 2.29403  | -0.84032 |
| C  | 2.51497  | -1.45333 | -0.31078 |
| S  | 1.25021  | -2.38535 | -1.05427 |
| S  | -0.87165 | -1.30383 | 2.02168  |
| S  | 0.19955  | 1.22492  | -2.15518 |

**1<sup>-</sup> B3P86 ethanol**

|    |         |          |          |
|----|---------|----------|----------|
| Ni | 0.07114 | -0.30714 | -0.12686 |
|----|---------|----------|----------|

|   |          |          |          |
|---|----------|----------|----------|
| C | 2.93274  | 0.52608  | 0.86484  |
| C | 3.8816   | -1.78589 | -0.26165 |
| C | 4.2912   | 0.26013  | 0.94942  |
| H | 2.49881  | 1.42779  | 1.28981  |
| C | 4.76479  | -0.92403 | 0.36975  |
| H | 4.22497  | -2.70846 | -0.71863 |
| H | 4.95725  | 0.95451  | 1.45026  |
| H | 5.82308  | -1.16855 | 0.413    |
| C | -0.61728 | 2.34969  | 1.45918  |
| C | -0.3919  | 3.68582  | -0.92427 |
| C | -0.82023 | 3.7223   | 1.4495   |
| H | -0.69835 | 1.75956  | 2.36875  |
| C | -0.70326 | 4.39402  | 0.22627  |
| H | -0.29689 | 4.18395  | -1.8839  |
| H | -1.06286 | 4.24841  | 2.36664  |
| H | -0.8562  | 5.4691   | 0.17606  |
| C | -2.80647 | -0.81437 | -1.29552 |
| C | -4.10276 | -1.27304 | -1.1114  |
| H | -2.46764 | -0.39877 | -2.24132 |
| C | -3.49929 | -1.82099 | 1.15948  |
| C | -4.44555 | -1.78429 | 0.14666  |
| H | -4.82105 | -1.2315  | -1.92323 |
| H | -3.74125 | -2.21215 | 2.14257  |
| H | -5.45151 | -2.1524  | 0.33162  |
| N | 2.07604  | -0.30256 | 0.2564   |
| N | -0.31493 | 1.66227  | 0.35179  |
| N | -1.88983 | -0.84955 | -0.32166 |
| C | -2.20118 | -1.34122 | 0.90182  |
| C | -0.19697 | 2.29382  | -0.84056 |
| C | 2.51411  | -1.45315 | -0.31009 |
| S | 1.24836  | -2.38383 | -1.05137 |
| S | -0.87223 | -1.30097 | 2.02304  |
| S | 0.19908  | 1.22531  | -2.15454 |

**1<sup>2-</sup>B3P86 water**

|    |          |          |          |
|----|----------|----------|----------|
| Ni | -0.00952 | -0.35268 | -0.0407  |
| C  | -2.90321 | -0.1009  | -0.78875 |
| C  | -4.18968 | -0.56431 | -1.03136 |
| H  | -2.62535 | 0.92799  | -0.99778 |
| C  | -3.47055 | -2.70759 | -0.19652 |
| C  | -4.47382 | -1.90392 | -0.72259 |
| H  | -4.94283 | 0.10005  | -1.4431  |
| H  | -3.66356 | -3.74628 | 0.05238  |
| H  | -5.46784 | -2.31127 | -0.89144 |
| C  | 0.25932  | 2.21995  | -1.4411  |
| C  | -0.81794 | 3.956    | 0.34679  |

|   |          |          |          |
|---|----------|----------|----------|
| C | 0.1626   | 3.55356  | -1.81012 |
| H | 0.68696  | 1.49196  | -2.12537 |
| C | -0.39837 | 4.44329  | -0.87985 |
| H | -1.251   | 4.62204  | 1.08599  |
| H | 0.51166  | 3.88144  | -2.78416 |
| H | -0.50144 | 5.50048  | -1.11361 |
| C | 2.30473  | -0.89656 | -1.67909 |
| C | 3.59287  | -1.16865 | -2.1136  |
| H | 1.4773   | -0.87862 | -2.3839  |
| C | 4.29207  | -0.93414 | 0.17449  |
| C | 4.61376  | -1.18315 | -1.14925 |
| H | 3.78897  | -1.36137 | -3.16343 |
| H | 5.06043  | -0.94266 | 0.94066  |
| H | 5.64315  | -1.38906 | -1.4333  |
| N | 1.97099  | -0.64524 | -0.39001 |
| N | -0.15099 | 1.72317  | -0.25149 |
| N | -1.91825 | -0.87217 | -0.28214 |
| S | -1.20929 | 1.9813   | 2.23383  |
| S | -0.83936 | -3.11308 | 0.6571   |
| S | 2.54215  | -0.37578 | 2.23829  |
| C | 2.95102  | -0.66633 | 0.56505  |
| C | -2.17514 | -2.18007 | 0.01973  |
| C | -0.69072 | 2.57636  | 0.67192  |

## 2<sub>N</sub> B3P86

|    |          |          |          |
|----|----------|----------|----------|
| Ni | -0.50033 | -0.09989 | -0.56222 |
| C  | -0.88623 | 1.98617  | 1.70151  |
| C  | 0.78942  | 3.63051  | 0.27901  |
| C  | -0.6278  | 3.25576  | 2.19434  |
| H  | -1.54968 | 1.29267  | 2.21062  |
| C  | 0.22611  | 4.08682  | 1.46059  |
| H  | 1.44724  | 4.2543   | -0.31686 |
| H  | -1.08698 | 3.58775  | 3.11934  |
| H  | 0.44515  | 5.09162  | 1.81292  |
| C  | -2.54166 | -1.73288 | 1.34009  |
| C  | -4.41147 | -1.0918  | -0.5666  |
| C  | -3.84849 | -2.15932 | 1.52527  |
| H  | -1.75467 | -1.96415 | 2.05436  |
| C  | -4.79204 | -1.82531 | 0.54494  |
| H  | -5.12147 | -0.82079 | -1.34081 |
| H  | -4.11915 | -2.7377  | 2.40219  |
| H  | -5.82601 | -2.14351 | 0.6545   |
| C  | 4.40115  | -0.18005 | -0.4781  |

|   |          |          |          |
|---|----------|----------|----------|
| C | 5.33294  | -1.06735 | -0.00403 |
| H | 4.64655  | 0.74969  | -0.98058 |
| C | 3.50992  | -2.47184 | 0.74808  |
| C | 4.86063  | -2.23929 | 0.62236  |
| H | 6.39154  | -0.865   | -0.11518 |
| H | 3.13238  | -3.3696  | 1.22442  |
| H | 5.56869  | -2.96763 | 1.00826  |
| N | -0.33999 | 1.54339  | 0.56459  |
| N | -2.16953 | -1.02247 | 0.27076  |
| N | 3.08205  | -0.42745 | -0.33975 |
| C | 2.56416  | -1.53755 | 0.25281  |
| C | -3.06794 | -0.69333 | -0.69081 |
| C | 0.49049  | 2.33006  | -0.15688 |
| S | 1.05877  | 1.5646   | -1.61581 |
| S | 0.88052  | -1.78114 | 0.38552  |
| S | -2.34983 | 0.21772  | -1.9795  |
| H | 2.40133  | 0.27247  | -0.73891 |

#### 2<sub>N</sub> B3P86 water

|    |          |          |          |
|----|----------|----------|----------|
| Ni | -0.50276 | 0.10399  | 0.57869  |
| C  | -0.90759 | -1.95936 | -1.70899 |
| C  | 0.76926  | -3.62803 | -0.31    |
| C  | -0.63616 | -3.21619 | -2.22792 |
| H  | -1.56469 | -1.25728 | -2.21384 |
| C  | 0.2176   | -4.05943 | -1.5085  |
| H  | 1.43436  | -4.26159 | 0.2672   |
| H  | -1.08122 | -3.52673 | -3.16679 |
| H  | 0.45056  | -5.0514  | -1.88557 |
| C  | -2.49539 | 1.75198  | -1.3237  |
| C  | -4.42742 | 1.12084  | 0.52516  |
| C  | -3.79329 | 2.1897   | -1.54461 |
| H  | -1.68993 | 1.97189  | -2.01929 |
| C  | -4.76933 | 1.86372  | -0.59642 |
| H  | -5.16665 | 0.85374  | 1.27308  |
| H  | -4.03256 | 2.76808  | -2.43018 |
| H  | -5.79625 | 2.19036  | -0.73635 |
| C  | 4.44844  | 0.17084  | 0.49436  |
| C  | 5.36974  | 1.06566  | 0.0099   |
| H  | 4.70771  | -0.75329 | 0.99779  |
| C  | 3.53302  | 2.44928  | -0.74382 |
| C  | 4.89007  | 2.22743  | -0.62027 |
| H  | 6.42957  | 0.86999  | 0.11742  |
| H  | 3.15311  | 3.34138  | -1.22847 |
| H  | 5.59042  | 2.9578   | -1.01411 |
| N  | -0.37548 | -1.54268 | -0.55286 |
| N  | -2.16106 | 1.03741  | -0.2421  |

|   |          |          |          |
|---|----------|----------|----------|
| N | 3.12617  | 0.41144  | 0.35949  |
| C | 2.60578  | 1.51251  | -0.23969 |
| C | -3.09431 | 0.71267  | 0.68291  |
| C | 0.45413  | -2.34299 | 0.15304  |
| S | 1.02068  | -1.5934  | 1.62833  |
| S | 0.90418  | 1.74326  | -0.37688 |
| S | -2.42035 | -0.2264  | 1.99103  |
| H | 2.45604  | -0.28514 | 0.75578  |

**2s B3P86 water**

|    |          |          |          |
|----|----------|----------|----------|
| Ni | 0.14077  | -0.18099 | -0.22973 |
| C  | 3.02937  | 0.53222  | 0.79031  |
| C  | 3.83297  | -1.85773 | -0.30404 |
| C  | 4.36811  | 0.18031  | 0.87476  |
| H  | 2.65176  | 1.46375  | 1.20258  |
| C  | 4.7675   | -1.03773 | 0.31351  |
| H  | 4.11792  | -2.80693 | -0.74531 |
| H  | 5.07727  | 0.83885  | 1.36405  |
| H  | 5.80887  | -1.34437 | 0.36007  |
| C  | -0.51638 | 2.28227  | 1.68887  |
| C  | -0.26629 | 3.82492  | -0.57203 |
| C  | -0.6818  | 3.6548   | 1.80024  |
| H  | -0.60356 | 1.62273  | 2.54792  |
| C  | -0.55183 | 4.43128  | 0.64274  |
| H  | -0.16128 | 4.40543  | -1.48266 |
| H  | -0.90513 | 4.10297  | 2.76218  |
| H  | -0.67464 | 5.50977  | 0.69296  |
| C  | -2.72327 | -0.14765 | -1.0895  |
| C  | -4.08678 | -0.3973  | -1.05873 |
| H  | -2.28488 | 0.56201  | -1.78537 |
| C  | -3.67686 | -1.96102 | 0.71171  |
| C  | -4.57285 | -1.31602 | -0.13064 |
| H  | -4.74672 | 0.12105  | -1.74561 |
| H  | -4.01146 | -2.7053  | 1.42616  |
| H  | -5.63364 | -1.54049 | -0.07283 |
| N  | 2.12669  | -0.25536 | 0.19273  |
| N  | -0.24057 | 1.69331  | 0.5185   |
| N  | -1.85055 | -0.74523 | -0.2591  |
| C  | -2.31778 | -1.65311 | 0.61742  |
| C  | -0.11352 | 2.4299   | -0.61004 |
| C  | 2.49623  | -1.43689 | -0.35197 |
| S  | 1.15365  | -2.28543 | -1.08128 |
| S  | -1.17673 | -2.44997 | 1.71664  |
| S  | 0.23707  | 1.44668  | -2.00885 |
| H  | -0.17    | -2.56071 | 0.78357  |

**2s B3P86 water**

|    |          |          |          |
|----|----------|----------|----------|
| Ni | 0.14077  | -0.18099 | -0.22973 |
| C  | 3.02937  | 0.53222  | 0.79031  |
| C  | 3.83297  | -1.85773 | -0.30404 |
| C  | 4.36811  | 0.18031  | 0.87476  |
| H  | 2.65176  | 1.46375  | 1.20258  |
| C  | 4.7675   | -1.03773 | 0.31351  |
| H  | 4.11792  | -2.80693 | -0.74531 |
| H  | 5.07727  | 0.83885  | 1.36405  |
| H  | 5.80887  | -1.34437 | 0.36007  |
| C  | -0.51638 | 2.28227  | 1.68887  |
| C  | -0.26629 | 3.82492  | -0.57203 |
| C  | -0.6818  | 3.6548   | 1.80024  |
| H  | -0.60356 | 1.62273  | 2.54792  |
| C  | -0.55183 | 4.43128  | 0.64274  |
| H  | -0.16128 | 4.40543  | -1.48266 |
| H  | -0.90513 | 4.10297  | 2.76218  |
| H  | -0.67464 | 5.50977  | 0.69296  |
| C  | -2.72327 | -0.14765 | -1.0895  |
| C  | -4.08678 | -0.3973  | -1.05873 |
| H  | -2.28488 | 0.56201  | -1.78537 |
| C  | -3.67686 | -1.96102 | 0.71171  |
| C  | -4.57285 | -1.31602 | -0.13064 |
| H  | -4.74672 | 0.12105  | -1.74561 |
| H  | -4.01146 | -2.7053  | 1.42616  |
| H  | -5.63364 | -1.54049 | -0.07283 |
| N  | 2.12669  | -0.25536 | 0.19273  |
| N  | -0.24057 | 1.69331  | 0.5185   |
| N  | -1.85055 | -0.74523 | -0.2591  |
| C  | -2.31778 | -1.65311 | 0.61742  |
| C  | -0.11352 | 2.4299   | -0.61004 |
| C  | 2.49623  | -1.43689 | -0.35197 |
| S  | 1.15365  | -2.28543 | -1.08128 |
| S  | -1.17673 | -2.44997 | 1.71664  |
| S  | 0.23707  | 1.44668  | -2.00885 |
| H  | -0.17    | -2.56071 | 0.78357  |

**4 B3P86 water**

|    |          |          |          |
|----|----------|----------|----------|
| Ni | 0.48818  | -0.13499 | 0.59814  |
| C  | 0.88626  | 1.96231  | -1.71201 |
| C  | -0.77201 | 3.62811  | -0.29311 |
| C  | 0.61508  | 3.22265  | -2.22455 |
| H  | 1.53664  | 1.26047  | -2.22685 |
| C  | -0.23024 | 4.06484  | -1.49443 |
| H  | -1.43065 | 4.26068  | 0.29277  |
| H  | 1.05326  | 3.53629  | -3.16579 |

|   |          |          |          |
|---|----------|----------|----------|
| H | -0.46421 | 5.05928  | -1.86459 |
| C | 2.3592   | -1.84296 | -1.33002 |
| C | 4.48483  | -0.87967 | 0.10942  |
| C | 3.63879  | -2.22008 | -1.70721 |
| H | 1.48179  | -2.19398 | -1.86664 |
| C | 4.71724  | -1.72274 | -0.96644 |
| H | 5.30258  | -0.47942 | 0.69975  |
| H | 3.78707  | -2.88065 | -2.55445 |
| H | 5.73521  | -1.99511 | -1.23201 |
| C | -4.48927 | -0.10233 | 0.56452  |
| C | -5.44942 | -0.90952 | 0.00866  |
| H | -4.70549 | 0.74046  | 1.21097  |
| C | -3.67873 | -2.17843 | -1.04681 |
| C | -5.02217 | -1.9679  | -0.81448 |
| H | -6.49869 | -0.72608 | 0.20486  |
| H | -3.34025 | -2.9925  | -1.67758 |
| H | -5.7545  | -2.62699 | -1.2712  |
| N | 0.36563  | 1.53982  | -0.55397 |
| N | 2.12793  | -1.02862 | -0.2907  |
| N | -3.17972 | -0.32871 | 0.31982  |
| C | -2.707   | -1.33405 | -0.46335 |
| C | 3.16076  | -0.5398  | 0.43659  |
| C | -0.45455 | 2.34011  | 0.16145  |
| S | -1.00955 | 1.58915  | 1.64121  |
| S | -1.02296 | -1.54261 | -0.72428 |
| S | 2.65705  | 0.50019  | 1.74183  |
| H | -2.47989 | 0.31045  | 0.75887  |
| O | 0.3679   | -1.58821 | 2.16561  |
| H | 0.38544  | -2.48561 | 1.79486  |
| H | 1.23747  | -1.45024 | 2.58871  |

#### 4 B3P86

|    |          |          |          |
|----|----------|----------|----------|
| Ni | 0.55643  | -0.14112 | 0.6769   |
| C  | 0.39909  | 1.68475  | -1.86528 |
| C  | -1.10587 | 3.41254  | -0.35736 |
| C  | 0.00749  | 2.88867  | -2.43095 |
| H  | 1.0055   | 0.96317  | -2.40609 |
| C  | -0.75565 | 3.76472  | -1.65206 |
| H  | -1.68918 | 4.07391  | 0.27469  |
| H  | 0.29933  | 3.13817  | -3.44557 |
| H  | -1.07099 | 4.72284  | -2.05762 |
| C  | 2.4008   | -1.90435 | -1.21115 |
| C  | 4.51304  | -0.43101 | -0.26768 |
| C  | 3.66913  | -2.17988 | -1.69781 |
| H  | 1.52463  | -2.45373 | -1.5467  |
| C  | 4.73962  | -1.41969 | -1.20989 |

|   |          |          |          |
|---|----------|----------|----------|
| H | 5.32133  | 0.17346  | 0.13022  |
| H | 3.81604  | -2.96381 | -2.43317 |
| H | 5.7491   | -1.60536 | -1.56888 |
| C | -4.35878 | -0.0403  | 0.34336  |
| C | -5.29539 | -0.82826 | -0.27269 |
| H | -4.58603 | 0.89339  | 0.84711  |
| C | -3.5163  | -2.36368 | -0.8578  |
| C | -4.84716 | -2.01919 | -0.88433 |
| H | -6.33904 | -0.53746 | -0.28242 |
| H | -3.15845 | -3.27465 | -1.32414 |
| H | -5.56014 | -2.67075 | -1.38239 |
| N | 0.06185  | 1.34263  | -0.61843 |
| N | 2.17597  | -0.94869 | -0.30166 |
| N | -3.05705 | -0.39826 | 0.35772  |
| C | -2.55987 | -1.5316  | -0.21503 |
| C | 3.20023  | -0.20779 | 0.18877  |
| C | -0.68303 | 2.17206  | 0.14484  |
| S | -1.01619 | 1.53689  | 1.73675  |
| S | -0.90781 | -1.92001 | -0.1321  |
| S | 2.70614  | 0.97515  | 1.35948  |
| H | -2.37781 | 0.23135  | 0.8569   |
| O | 0.97673  | -1.29685 | 2.45047  |
| H | 0.29701  | -1.06114 | 3.09984  |
| H | 1.75108  | -0.72738 | 2.66213  |

**2N<sup>-</sup> B3P86 water doublet**

|    |          |          |          |
|----|----------|----------|----------|
| Ni | -0.52611 | -0.53489 | -0.22818 |
| C  | -3.25975 | 0.81998  | -0.59163 |
| C  | -4.49428 | -1.41973 | 0.37287  |
| C  | -4.64501 | 0.81263  | -0.51697 |
| H  | -2.71773 | 1.6862   | -0.9631  |
| C  | -5.26868 | -0.33883 | -0.02293 |
| H  | -4.95236 | -2.32304 | 0.76317  |
| H  | -5.21597 | 1.67899  | -0.83422 |
| H  | -6.35192 | -0.3882  | 0.0534   |
| C  | 0.01834  | 2.13636  | -1.51611 |
| C  | 0.67046  | 3.38178  | 0.81641  |
| C  | 0.28677  | 3.49574  | -1.55356 |
| H  | -0.24576 | 1.59005  | -2.41883 |
| C  | 0.61575  | 4.12842  | -0.34973 |
| H  | 0.93273  | 3.84292  | 1.76318  |
| H  | 0.23721  | 4.03956  | -2.4911  |
| H  | 0.83181  | 5.19343  | -0.3264  |
| C  | 3.98648  | -0.15432 | 1.13068  |
| C  | 5.17949  | -0.57459 | 0.60196  |
| H  | 3.89804  | 0.46186  | 2.0185   |



|   |          |          |          |
|---|----------|----------|----------|
| C | 3.93238  | -1.71206 | -1.13362 |
| C | 5.13806  | -1.37353 | -0.55958 |
| H | 6.11527  | -0.29484 | 1.07028  |
| H | 3.8906   | -2.32447 | -2.02753 |
| H | 6.06335  | -1.72496 | -1.00693 |
| N | -2.50115 | -0.22168 | -0.21667 |
| N | 0.05769  | 1.40429  | -0.38972 |
| N | 2.81548  | -0.50044 | 0.54979  |
| C | 2.70954  | -1.26907 | -0.57106 |
| C | 0.39038  | 1.99978  | 0.78347  |
| C | -3.0919  | -1.34535 | 0.27226  |
| S | -1.97583 | -2.59784 | 0.72672  |
| S | 1.17533  | -1.66679 | -1.22264 |
| S | 0.46887  | 0.97733  | 2.19601  |
| H | 1.93953  | -0.16242 | 1.0086   |

#### 4- B3P86 water

|    |          |          |          |
|----|----------|----------|----------|
| Ni | 0.48561  | -0.13627 | 0.59705  |
| C  | 0.89716  | 1.96326  | -1.70856 |
| C  | -0.76007 | 3.63194  | -0.29192 |
| C  | 0.63099  | 3.22504  | -2.22016 |
| H  | 1.54705  | 1.26029  | -2.22249 |
| C  | -0.21377 | 4.06873  | -1.49113 |
| H  | -1.41824 | 4.26567  | 0.29322  |
| H  | 1.07266  | 3.53869  | -3.15977 |
| H  | -0.44364 | 5.06445  | -1.86046 |
| C  | 2.35769  | -1.84262 | -1.33196 |
| C  | 4.4818   | -0.88816 | 0.11549  |
| C  | 3.63747  | -2.22002 | -1.70821 |
| H  | 1.48083  | -2.19029 | -1.87169 |
| C  | 4.71516  | -1.72719 | -0.9633  |
| H  | 5.29894  | -0.49133 | 0.70894  |
| H  | 3.78644  | -2.8773  | -2.55791 |
| H  | 5.73329  | -1.99984 | -1.22804 |
| C  | -4.4899  | -0.09956 | 0.56636  |
| C  | -5.45112 | -0.90628 | 0.01159  |
| H  | -4.70489 | 0.74195  | 1.21487  |
| C  | -3.68249 | -2.17234 | -1.05077 |
| C  | -5.02546 | -1.9629  | -0.81461 |
| H  | -6.49995 | -0.72378 | 0.21096  |
| H  | -3.34527 | -2.9851  | -1.68388 |
| H  | -5.75863 | -2.62154 | -1.27065 |
| N  | 0.37223  | 1.54072  | -0.55254 |
| N  | 2.12548  | -1.03214 | -0.28984 |
| N  | -3.18091 | -0.32484 | 0.3179   |
| C  | -2.7097  | -1.3287  | -0.46808 |

|   |          |          |          |
|---|----------|----------|----------|
| C | 3.15756  | -0.54759 | 0.44145  |
| C | -0.4477  | 2.34234  | 0.16161  |
| S | -1.009   | 1.59085  | 1.63872  |
| S | -1.02616 | -1.53584 | -0.73336 |
| S | 2.65298  | 0.4886   | 1.74935  |
| H | -2.48021 | 0.31409  | 0.75605  |
| O | 0.35585  | -1.59214 | 2.16077  |
| H | 0.37555  | -2.48906 | 1.78903  |
| H | 1.22369  | -1.45378 | 2.58753  |

**2<sub>N</sub> B3P86 water quartet**

|    |          |          |          |
|----|----------|----------|----------|
| Ni | -0.40281 | 0.12983  | 0.49192  |
| C  | -1.32134 | -2.01648 | -1.55623 |
| C  | 0.2295   | -3.81823 | -0.18083 |
| C  | -1.29109 | -3.33249 | -1.99095 |
| H  | -1.91979 | -1.25944 | -2.05532 |
| C  | -0.49868 | -4.24367 | -1.28205 |
| H  | 0.85031  | -4.50494 | 0.38516  |
| H  | -1.87098 | -3.63661 | -2.85547 |
| H  | -0.45313 | -5.28415 | -1.59214 |
| C  | -2.361   | 1.86638  | -1.36203 |
| C  | -4.22221 | 1.54575  | 0.63124  |
| C  | -3.61553 | 2.43509  | -1.52923 |
| H  | -1.5821  | 1.96134  | -2.11408 |
| C  | -4.55673 | 2.26528  | -0.5071  |
| H  | -4.93469 | 1.40002  | 1.43661  |
| H  | -3.8491  | 2.9927   | -2.42967 |
| H  | -5.55008 | 2.69559  | -0.60295 |
| C  | 4.58624  | -0.16081 | 0.12526  |
| C  | 5.51407  | 0.83057  | -0.0479  |
| H  | 4.83448  | -1.18353 | 0.38482  |
| C  | 3.70375  | 2.39794  | -0.48083 |
| C  | 5.10472  | 2.144    | -0.38075 |
| H  | 6.56578  | 0.58959  | 0.08259  |
| H  | 3.34214  | 3.39958  | -0.69623 |
| H  | 5.82457  | 2.94488  | -0.51155 |
| N  | -0.61816 | -1.60367 | -0.49395 |
| N  | -2.03394 | 1.17254  | -0.26486 |
| N  | 3.22718  | 0.09236  | -0.0863  |
| C  | 2.77854  | 1.39641  | -0.31234 |
| C  | -2.93188 | 1.00024  | 0.73318  |
| C  | 0.15642  | -2.46858 | 0.20208  |
| S  | 0.97758  | -1.71709 | 1.54256  |
| S  | 1.04332  | 1.65799  | -0.47186 |
| S  | -2.28361 | 0.06761  | 2.05622  |
| H  | 2.55017  | -0.56347 | 0.31042  |

### 3 B3P86 singlet

|    |          |          |          |
|----|----------|----------|----------|
| C  | 1.64865  | 2.15366  | -0.701   |
| C  | -0.03023 | 4.15449  | 0.05887  |
| C  | 2.08897  | 3.45915  | -0.82683 |
| H  | 2.26967  | 1.30152  | -0.96787 |
| C  | 1.21725  | 4.48237  | -0.43152 |
| H  | -0.73002 | 4.91895  | 0.37992  |
| H  | 3.08399  | 3.6635   | -1.20972 |
| H  | 1.51781  | 5.52625  | -0.50465 |
| C  | 3.91306  | -1.49044 | -1.40952 |
| C  | 3.85823  | -1.84724 | 1.27621  |
| C  | 4.98306  | -2.15766 | -0.82413 |
| H  | 3.8958   | -1.32539 | -2.48828 |
| C  | 4.94026  | -2.3293  | 0.56664  |
| H  | 3.78913  | -1.97254 | 2.35284  |
| H  | 5.81042  | -2.52496 | -1.42515 |
| H  | 5.74818  | -2.84256 | 1.08613  |
| C  | -4.46882 | -0.14728 | -0.04536 |
| C  | -5.41322 | -1.13352 | -0.17164 |
| H  | -4.69437 | 0.90647  | 0.08784  |
| C  | -3.60647 | -2.73752 | -0.33889 |
| C  | -4.95185 | -2.46422 | -0.31639 |
| H  | -6.46968 | -0.89186 | -0.14985 |
| H  | -3.2364  | -3.75114 | -0.4523  |
| H  | -5.66752 | -3.27746 | -0.41268 |
| N  | 0.42964  | 1.83005  | -0.23345 |
| N  | 2.85979  | -1.00877 | -0.74501 |
| N  | -3.15307 | -0.43434 | -0.07412 |
| C  | -2.64362 | -1.69373 | -0.22912 |
| C  | 2.80267  | -1.18154 | 0.59651  |
| C  | -0.44253 | 2.80107  | 0.16164  |
| S  | -1.99502 | 2.39793  | 0.79813  |
| S  | -0.97089 | -1.97102 | -0.26358 |
| S  | 1.44385  | -0.58272 | 1.4958   |
| H  | -2.48548 | 0.37143  | 0.07078  |
| Ni | -0.06632 | 0.00491  | -0.15713 |
| H  | -0.94845 | 0.33484  | -1.27749 |

### 3 B3P86 water singlet

|   |          |         |          |
|---|----------|---------|----------|
| C | 1.64865  | 2.15366 | -0.701   |
| C | -0.03023 | 4.15449 | 0.05887  |
| C | 2.08897  | 3.45915 | -0.82683 |
| H | 2.26967  | 1.30152 | -0.96787 |
| C | 1.21725  | 4.48237 | -0.43152 |
| H | -0.73002 | 4.91895 | 0.37992  |

|    |          |          |          |
|----|----------|----------|----------|
| H  | 3.08399  | 3.6635   | -1.20972 |
| H  | 1.51781  | 5.52625  | -0.50465 |
| C  | 3.91306  | -1.49044 | -1.40952 |
| C  | 3.85823  | -1.84724 | 1.27621  |
| C  | 4.98306  | -2.15766 | -0.82413 |
| H  | 3.8958   | -1.32539 | -2.48828 |
| C  | 4.94026  | -2.3293  | 0.56664  |
| H  | 3.78913  | -1.97254 | 2.35284  |
| H  | 5.81042  | -2.52496 | -1.42515 |
| H  | 5.74818  | -2.84256 | 1.08613  |
| C  | -4.46882 | -0.14728 | -0.04536 |
| C  | -5.41322 | -1.13352 | -0.17164 |
| H  | -4.69437 | 0.90647  | 0.08784  |
| C  | -3.60647 | -2.73752 | -0.33889 |
| C  | -4.95185 | -2.46422 | -0.31639 |
| H  | -6.46968 | -0.89186 | -0.14985 |
| H  | -3.2364  | -3.75114 | -0.4523  |
| H  | -5.66752 | -3.27746 | -0.41268 |
| N  | 0.42964  | 1.83005  | -0.23345 |
| N  | 2.85979  | -1.00877 | -0.74501 |
| N  | -3.15307 | -0.43434 | -0.07412 |
| C  | -2.64362 | -1.69373 | -0.22912 |
| C  | 2.80267  | -1.18154 | 0.59651  |
| C  | -0.44253 | 2.80107  | 0.16164  |
| S  | -1.99502 | 2.39793  | 0.79813  |
| S  | -0.97089 | -1.97102 | -0.26358 |
| S  | 1.44385  | -0.58272 | 1.4958   |
| H  | -2.48548 | 0.37143  | 0.07078  |
| Ni | -0.06632 | 0.00491  | -0.15713 |
| H  | -0.94845 | 0.33484  | -1.27749 |

### 3 B3P86 water triplet

-1 3

|   |            |             |             |
|---|------------|-------------|-------------|
| C | 3.03190100 | 0.80216600  | -1.08984800 |
| C | 2.85934400 | 3.31781200  | -0.02177400 |
| C | 4.08060400 | 1.68390700  | -1.30766200 |
| H | 3.04427200 | -0.20968400 | -1.48807000 |
| C | 3.98139800 | 2.96807700  | -0.75716000 |
| H | 2.75896400 | 4.30670900  | 0.41437400  |
| H | 4.94518000 | 1.37821700  | -1.88729300 |
| H | 4.78013800 | 3.69042000  | -0.90513400 |
| C | 0.64696900 | -2.36027500 | -1.58362500 |
| C | 1.90446300 | -3.56840300 | 0.52332300  |
| C | 1.13604200 | -3.64538600 | -1.75994700 |
| H | 0.13727000 | -1.82691300 | -2.38264100 |
| C | 1.77802800 | -4.25414300 | -0.67344600 |

|    |             |             |             |
|----|-------------|-------------|-------------|
| H  | 2.39774400  | -4.01903500 | 1.37876100  |
| H  | 1.01988400  | -4.15315700 | -2.71150100 |
| H  | 2.17645800  | -5.26131200 | -0.76660700 |
| C  | -3.96535100 | 1.07339900  | -1.67845500 |
| C  | -5.28528600 | 0.94448000  | -1.32112300 |
| H  | -3.63225400 | 1.53373500  | -2.60233500 |
| C  | -4.55906600 | -0.13903500 | 0.72030700  |
| C  | -5.57501000 | 0.32137500  | -0.09155600 |
| H  | -6.06845700 | 1.31333400  | -1.97235800 |
| H  | -4.77265400 | -0.61923000 | 1.66891700  |
| H  | -6.60809600 | 0.20177200  | 0.22196200  |
| N  | 1.94694000  | 1.13458800  | -0.38116900 |
| N  | 0.76573200  | -1.69262000 | -0.42858700 |
| N  | -2.99119100 | 0.61694600  | -0.86617900 |
| C  | -3.20727400 | 0.00863600  | 0.32980100  |
| C  | 1.38334400  | -2.26156700 | 0.63554900  |
| C  | 1.83295300  | 2.37043400  | 0.16025100  |
| S  | 0.35449200  | 2.61393600  | 1.04191800  |
| S  | -1.86659500 | -0.52677600 | 1.26309300  |
| S  | 1.45536800  | -1.27368800 | 2.06119300  |
| H  | -1.96511800 | 0.69170600  | -1.14483900 |
| Ni | 0.17583400  | 0.19139300  | 0.10188300  |
| H  | -0.53765600 | 0.61762000  | -1.31147200 |

#### TS B3P86 water

|    |          |          |          |
|----|----------|----------|----------|
| Ni | 0.19286  | 0.18448  | 0.25059  |
| S  | -1.87364 | -0.40664 | 1.36582  |
| N  | 1.94214  | 1.06072  | -0.41411 |
| S  | 1.45572  | -1.26444 | 2.01079  |
| N  | 0.62719  | -1.70186 | -0.41642 |
| S  | 0.50747  | 2.57956  | 1.12046  |
| C  | -3.15746 | 0.13749  | 0.32429  |
| C  | 2.96122  | 0.68932  | -1.19699 |
| C  | 1.9149   | 2.29563  | 0.13987  |
| C  | 1.27828  | -2.28744 | 0.61734  |
| C  | 0.41741  | -2.37177 | -1.5563  |
| C  | -4.52325 | 0.01631  | 0.66716  |
| N  | -2.84473 | 0.69653  | -0.86219 |
| C  | 4.02748  | 1.5305   | -1.48007 |
| C  | 2.96455  | 3.20198  | -0.10357 |
| C  | 1.73851  | -3.61379 | 0.49759  |
| C  | 0.8431   | -3.67855 | -1.74113 |
| C  | -5.49463 | 0.46604  | -0.20857 |
| C  | -3.77787 | 1.13335  | -1.71849 |
| C  | 4.0188   | 2.81228  | -0.91541 |
| C  | 1.51701  | -4.30354 | -0.68384 |

|   |          |          |          |
|---|----------|----------|----------|
| C | -5.12732 | 1.04098  | -1.43558 |
| H | 2.90571  | -0.319   | -1.60005 |
| H | -0.11118 | -1.8274  | -2.33518 |
| H | -4.79056 | -0.43033 | 1.6195   |
| H | -1.53032 | 0.72748  | -1.08798 |
| H | 4.83753  | 1.19559  | -2.11913 |
| H | 2.93572  | 4.18973  | 0.34543  |
| H | 0.65514  | -4.19072 | -2.67866 |
| H | -6.5444  | 0.37303  | 0.05646  |
| H | -3.4053  | 1.56365  | -2.64516 |
| H | 4.83563  | 3.50202  | -1.11193 |
| H | 1.86661  | -5.32756 | -0.78749 |
| H | -5.86704 | 1.40251  | -2.14116 |
| H | 2.25881  | -4.07657 | 1.33015  |
| H | -0.55563 | 0.71595  | -1.20353 |

### 6 B3P86 water singlet

|    |          |          |          |
|----|----------|----------|----------|
| Ni | -0.52611 | -0.53489 | -0.22818 |
| C  | -3.25975 | 0.81998  | -0.59163 |
| C  | -4.49428 | -1.41973 | 0.37287  |
| C  | -4.64501 | 0.81263  | -0.51697 |
| H  | -2.71773 | 1.6862   | -0.9631  |
| C  | -5.26868 | -0.33883 | -0.02293 |
| H  | -4.95236 | -2.32304 | 0.76317  |
| H  | -5.21597 | 1.67899  | -0.83422 |
| H  | -6.35192 | -0.3882  | 0.0534   |
| C  | 0.01834  | 2.13636  | -1.51611 |
| C  | 0.67046  | 3.38178  | 0.81641  |
| C  | 0.28677  | 3.49574  | -1.55356 |
| H  | -0.24576 | 1.59005  | -2.41883 |
| C  | 0.61575  | 4.12842  | -0.34973 |
| H  | 0.93273  | 3.84292  | 1.76318  |
| H  | 0.23721  | 4.03956  | -2.4911  |
| H  | 0.83181  | 5.19343  | -0.3264  |
| C  | 3.98648  | -0.15432 | 1.13068  |
| C  | 5.17949  | -0.57459 | 0.60196  |
| H  | 3.89804  | 0.46186  | 2.0185   |
| C  | 3.93238  | -1.71206 | -1.13362 |
| C  | 5.13806  | -1.37353 | -0.55958 |
| H  | 6.11527  | -0.29484 | 1.07028  |
| H  | 3.8906   | -2.32447 | -2.02753 |
| H  | 6.06335  | -1.72496 | -1.00693 |
| N  | -2.50115 | -0.22168 | -0.21667 |
| N  | 0.05769  | 1.40429  | -0.38972 |
| N  | 2.81548  | -0.50044 | 0.54979  |
| C  | 2.70954  | -1.26907 | -0.57106 |

|   |          |          |          |
|---|----------|----------|----------|
| C | 0.39038  | 1.99978  | 0.78347  |
| C | -3.0919  | -1.34535 | 0.27226  |
| S | -1.97583 | -2.59784 | 0.72672  |
| S | 1.17533  | -1.66679 | -1.22264 |
| S | 0.46887  | 0.97733  | 2.19601  |
| H | 1.93953  | -0.16242 | 1.0086   |

### 6 B3P86 water triplet

-2 3

|    |             |             |             |
|----|-------------|-------------|-------------|
| Ni | -0.64466300 | -0.66252700 | -0.07288300 |
| C  | -2.93904000 | 1.28364800  | -0.39843800 |
| C  | -4.77254000 | -0.70413300 | -0.02880900 |
| C  | -4.28469400 | 1.61306200  | -0.45305500 |
| H  | -2.16649500 | 2.03534100  | -0.53661900 |
| C  | -5.21861600 | 0.58775900  | -0.26362400 |
| H  | -5.47437500 | -1.51801100 | 0.12346200  |
| H  | -4.59079600 | 2.63766100  | -0.63709300 |
| H  | -6.28445300 | 0.79892900  | -0.29816200 |
| C  | 0.50250000  | 1.56410500  | -1.58021400 |
| C  | 1.20512600  | 3.18848600  | 0.47789700  |
| C  | 1.03486800  | 2.80580100  | -1.88574800 |
| H  | 0.20069100  | 0.87566600  | -2.36701400 |
| C  | 1.38873300  | 3.63881600  | -0.81805200 |
| H  | 1.47529400  | 3.81049700  | 1.32534800  |
| H  | 1.16390100  | 3.10968900  | -2.91937200 |
| H  | 1.80623300  | 4.62608800  | -0.99962900 |
| C  | 4.05233700  | 0.01302200  | 0.90294600  |
| C  | 5.08453800  | -0.33211900 | 0.07030600  |
| H  | 4.12045200  | 0.77559800  | 1.67050000  |
| C  | 3.60737600  | -1.92237400 | -1.03459600 |
| C  | 4.90605000  | -1.33889000 | -0.90793400 |
| H  | 6.03430300  | 0.18665600  | 0.17216500  |
| H  | 3.40845700  | -2.65369500 | -1.81324800 |
| H  | 5.70817800  | -1.61771700 | -1.58353400 |
| N  | -2.49435300 | 0.03511700  | -0.17506400 |
| N  | 0.31022700  | 1.11596400  | -0.32539200 |
| N  | 2.83539700  | -0.66743300 | 0.83622200  |
| C  | 2.57602600  | -1.57906700 | -0.19176700 |
| C  | 0.66328600  | 1.90463000  | 0.72421600  |
| C  | -3.38993500 | -0.97338600 | 0.01553600  |
| S  | -2.69148400 | -2.53755000 | 0.30534000  |
| S  | 0.95571000  | -2.26554700 | -0.24640000 |
| S  | 0.45837100  | 1.29489100  | 2.34458400  |
| H  | 2.03263800  | -0.26635300 | 1.32519400  |

### 7 B3P86 water

|    |          |          |          |
|----|----------|----------|----------|
| Ni | -0.25695 | -0.4206  | -0.09203 |
| C  | -2.47622 | -0.56909 | 1.87457  |
| C  | -4.36489 | -1.55984 | 0.16676  |
| C  | -3.74389 | -0.83153 | 2.36918  |
| H  | -1.6884  | -0.15969 | 2.49987  |
| C  | -4.70587 | -1.33589 | 1.49297  |
| H  | -5.08902 | -1.95191 | -0.53947 |
| H  | -3.96901 | -0.64122 | 3.41284  |
| H  | -5.7122  | -1.55248 | 1.83915  |
| C  | -0.87199 | 2.06612  | -1.75117 |
| C  | 0.04599  | 3.66576  | 0.26508  |
| C  | -0.89682 | 3.43951  | -1.93733 |
| H  | -1.22747 | 1.38386  | -2.51869 |
| C  | -0.42734 | 4.25115  | -0.89958 |
| H  | 0.4194   | 4.2698   | 1.08549  |
| H  | -1.27391 | 3.85907  | -2.86379 |
| H  | -0.43066 | 5.33295  | -1.00269 |
| C  | 4.24437  | 0.09301  | 1.1826   |
| C  | 5.40839  | -0.54141 | 0.82505  |
| H  | 4.18596  | 0.87981  | 1.92608  |
| C  | 4.12446  | -1.87353 | -0.73414 |
| C  | 5.3348   | -1.54591 | -0.15629 |
| H  | 6.34619  | -0.26678 | 1.29229  |
| H  | 4.05614  | -2.64647 | -1.49134 |
| H  | 6.23516  | -2.06965 | -0.46337 |
| N  | -2.12823 | -0.78157 | 0.59103  |
| N  | -0.41859 | 1.49274  | -0.62531 |
| N  | 3.07337  | -0.24654 | 0.60187  |
| C  | 2.94281  | -1.20589 | -0.34883 |
| C  | 0.0466   | 2.26461  | 0.38802  |
| C  | -3.06153 | -1.27201 | -0.25253 |
| S  | -2.57571 | -1.54142 | -1.92199 |
| S  | 1.40656  | -1.56895 | -1.05188 |
| S  | 0.61395  | 1.4034   | 1.79909  |
| H  | 2.20966  | 0.25993  | 0.91735  |
| H  | -1.26301 | -1.13157 | -1.59979 |

**Water:**

|   |          |          |    |
|---|----------|----------|----|
| O | -1.76084 | -0.07227 | 0. |
| H | -0.80084 | -0.07227 | 0. |
| H | -2.0813  | 0.83266  | 0. |

**Hydrogen:**

|   |    |    |          |
|---|----|----|----------|
| H | 0. | 0. | 0.37139  |
| H | 0. | 0. | -0.37139 |



5-

Charge = -2 Multiplicity = 2

|    |          |          |          |
|----|----------|----------|----------|
| Ni | 0.70373  | -0.03528 | 0.94575  |
| C  | 1.57219  | 1.94187  | -1.03698 |
| C  | -0.29573 | 3.78832  | -0.31736 |
| C  | 1.56047  | 3.15683  | -1.70223 |
| H  | 2.29676  | 1.16961  | -1.27783 |
| C  | 0.60014  | 4.10248  | -1.32882 |
| H  | -1.0549  | 4.49828  | -0.00525 |
| H  | 2.283    | 3.35517  | -2.48722 |
| H  | 0.55222  | 5.06997  | -1.8218  |
| C  | 1.61107  | -1.82081 | -1.16373 |
| C  | 4.25562  | -2.04251 | -0.61653 |
| C  | 2.36777  | -2.66227 | -1.96116 |
| H  | 0.5449   | -1.69424 | -1.34321 |
| C  | 3.73318  | -2.77038 | -1.66949 |
| H  | 5.31057  | -2.10604 | -0.36924 |
| H  | 1.90739  | -3.21013 | -2.77682 |
| H  | 4.37779  | -3.41611 | -2.26092 |
| C  | -3.70513 | -0.91083 | 1.43591  |
| C  | -4.60689 | -1.93532 | 1.30535  |
| H  | -3.36432 | -0.52003 | 2.38834  |
| C  | -4.39857 | -1.71494 | -1.09663 |
| C  | -4.95312 | -2.33834 | -0.00005 |
| H  | -5.02938 | -2.40943 | 2.1828   |
| H  | -4.66128 | -2.01945 | -2.10335 |
| H  | -5.66358 | -3.1473  | -0.14495 |
| N  | 0.71024  | 1.62382  | -0.04937 |
| N  | 2.10308  | -1.1054  | -0.13384 |
| N  | -3.17365 | -0.31629 | 0.34473  |
| C  | -3.46751 | -0.65342 | -0.94849 |
| C  | 3.42853  | -1.19561 | 0.16429  |
| C  | -0.23467 | 2.5353   | 0.32092  |
| S  | -1.32344 | 2.06793  | 1.6015   |
| S  | -2.73454 | 0.17806  | -2.24396 |
| S  | 4.09322  | -0.27545 | 1.48601  |
| H  | -2.50108 | 0.45837  | 0.52232  |
| O  | 0.20598  | -1.3454  | 2.23858  |
| H  | 0.80416  | -2.10345 | 2.17004  |

5

Charge = -1 Multiplicity = 3

|    |         |          |          |
|----|---------|----------|----------|
| Ni | 0.48818 | -0.13499 | 0.59814  |
| C  | 0.88626 | 1.96231  | -1.71201 |

|   |          |          |          |
|---|----------|----------|----------|
| C | -0.77201 | 3.62811  | -0.29311 |
| C | 0.61508  | 3.22265  | -2.22455 |
| H | 1.53664  | 1.26047  | -2.22685 |
| C | -0.23024 | 4.06484  | -1.49443 |
| H | -1.43065 | 4.26068  | 0.29277  |
| H | 1.05326  | 3.53629  | -3.16579 |
| H | -0.46421 | 5.05928  | -1.86459 |
| C | 2.3592   | -1.84296 | -1.33002 |
| C | 4.48483  | -0.87967 | 0.10942  |
| C | 3.63879  | -2.22008 | -1.70721 |
| H | 1.48179  | -2.19398 | -1.86664 |
| C | 4.71724  | -1.72274 | -0.96644 |
| H | 5.30258  | -0.47942 | 0.69975  |
| H | 3.78707  | -2.88065 | -2.55445 |
| H | 5.73521  | -1.99511 | -1.23201 |
| C | -4.48927 | -0.10233 | 0.56452  |
| C | -5.44942 | -0.90952 | 0.00866  |
| H | -4.70549 | 0.74046  | 1.21097  |
| C | -3.67873 | -2.17843 | -1.04681 |
| C | -5.02217 | -1.9679  | -0.81448 |
| H | -6.49869 | -0.72608 | 0.20486  |
| H | -3.34025 | -2.9925  | -1.67758 |
| H | -5.7545  | -2.62699 | -1.2712  |
| N | 0.36563  | 1.53982  | -0.55397 |
| N | 2.12793  | -1.02862 | -0.2907  |
| N | -3.17972 | -0.32871 | 0.31982  |
| C | -2.707   | -1.33405 | -0.46335 |
| C | 3.16076  | -0.5398  | 0.43659  |
| C | -0.45455 | 2.34011  | 0.16145  |
| S | -1.00955 | 1.58915  | 1.64121  |
| S | -1.02296 | -1.54261 | -0.72428 |
| S | 2.65705  | 0.50019  | 1.74183  |
| H | -2.47989 | 0.31045  | 0.75887  |
| O | 0.3679   | -1.58821 | 2.16561  |
| H | 1.23747  | -1.45024 | 2.58871  |

8

Charge = -2 Multiplicity = 3

|   |         |          |          |
|---|---------|----------|----------|
| C | 3.0319  | 0.80217  | -1.08985 |
| C | 2.85934 | 3.31781  | -0.02177 |
| C | 4.0806  | 1.68391  | -1.30766 |
| H | 3.04427 | -0.20968 | -1.48807 |
| C | 3.9814  | 2.96808  | -0.75716 |
| H | 2.75896 | 4.30671  | 0.41437  |
| H | 4.94518 | 1.37822  | -1.88729 |

|    |          |          |          |
|----|----------|----------|----------|
| H  | 4.78014  | 3.69042  | -0.90513 |
| C  | 0.64697  | -2.36028 | -1.58363 |
| C  | 1.90446  | -3.5684  | 0.52332  |
| C  | 1.13604  | -3.64539 | -1.75995 |
| H  | 0.13727  | -1.82691 | -2.38264 |
| C  | 1.77803  | -4.25414 | -0.67345 |
| H  | 2.39774  | -4.01903 | 1.37876  |
| H  | 1.01988  | -4.15316 | -2.7115  |
| H  | 2.17646  | -5.26131 | -0.76661 |
| C  | -3.96535 | 1.0734   | -1.67846 |
| C  | -5.28529 | 0.94448  | -1.32112 |
| H  | -3.63225 | 1.53374  | -2.60234 |
| C  | -4.55907 | -0.13904 | 0.72031  |
| C  | -5.57501 | 0.32138  | -0.09156 |
| H  | -6.06846 | 1.31333  | -1.97236 |
| H  | -4.77265 | -0.61923 | 1.66892  |
| H  | -6.6081  | 0.20177  | 0.22196  |
| N  | 1.94694  | 1.13459  | -0.38117 |
| N  | 0.76573  | -1.69262 | -0.42859 |
| N  | -2.99119 | 0.61695  | -0.86618 |
| C  | -3.20727 | 0.00864  | 0.3298   |
| C  | 1.38334  | -2.26157 | 0.63555  |
| C  | 1.83295  | 2.37043  | 0.16025  |
| S  | 0.35449  | 2.61394  | 1.04192  |
| S  | -1.8666  | -0.52678 | 1.26309  |
| S  | 1.45537  | -1.27369 | 2.06119  |
| Ni | 0.17583  | 0.19139  | 0.10188  |
| H  | -0.53766 | 0.61762  | -1.31147 |

### Corrected pKa referenced to experimental conditions to calculate $\Delta G$

$$\Delta G = G_{\text{products}} - G_{\text{reactants}}$$

$$\ln(10)RT = 1.364247$$

$$\text{pKa}_{\text{calculated}} = \frac{\Delta G}{\ln(10)RT}$$

$$\text{pKa}_{\text{corrected}} = \text{pKa}_{\text{calculated}} - \text{pH}_{\text{experimental}}$$

$$\Delta G_{\text{corrected}} = \text{pKa}_{\text{corrected}} * \ln(10)RT$$

#### Example:

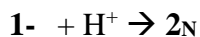

$$\Delta G = -2173599.531 - (-2173321.982 - 264) = -13.549 \text{ kcal/mol}$$

$$\ln(10) RT = 1.364247$$

$$\text{pKa}_{\text{calculated}} = -\frac{13.549}{1.364247} = 9.9315$$

$$\text{pKa}_{\text{corrected}} = 9.9315 - 12 = -2.0685$$

$$\Delta G_{\text{corrected}} = -2.0685 * 1.364247 = 2.821942 \text{ kcal/mol}$$
